# Supplementary material for: Comparative Analysis of Pan-cancer and Normal Tissues Reveals Cancer Tissue-enriched CircRNAs Associated with Cancer Mutations as Potential Exosomal Biomarkers
Source: Research Square preprint supplement (doi:10.21203/rs.3.rs-421398/v1), 2021-05-04
Supplement: Supplementary file 1 [file 8b4819a4b5b1b420e0a3f966.docx]

Additional file 1: Supplementary figures for:

**Comparative Analysis of Pan-cancer and Normal Tissues Reveals Cancer Tissue-enriched CircRNAs Associated with Cancer Mutations as Potential Exosomal Biomarkers**

Xuezhu Wang1, Yucheng Dong1, Zilong Wu2, Guanqun Wang3, Yongchang Zheng1,*

1Department of Liver Surgery, Peking Union Medical College Hospital, Chinese Academy of Medical Sciences and Peking Union Medical College (CAMS & PUMC), Beijing, 100730, China

2Department of Hepatobiliary Surgery, Hunan Provincial People's Hospital, the First Affiliated Hospital of Hunan Normal University, Changsha, 410005, China

3School of Life Sciences, Tsinghua-Peking Center for Life Sciences, Center for Synthetic and Systems Biology, Ministry of Education Key Laboratory of Bioinformatics, Tsinghua University, 100084 Beijing, China

***To whom correspondence should be addressed. Email: yong-chang_zheng@outlook.com**

**Table of Contents**

| Fig S1-S4 | Page 1-7 |
| --- | --- |
| Table S1-S2 | Additional File 2 |


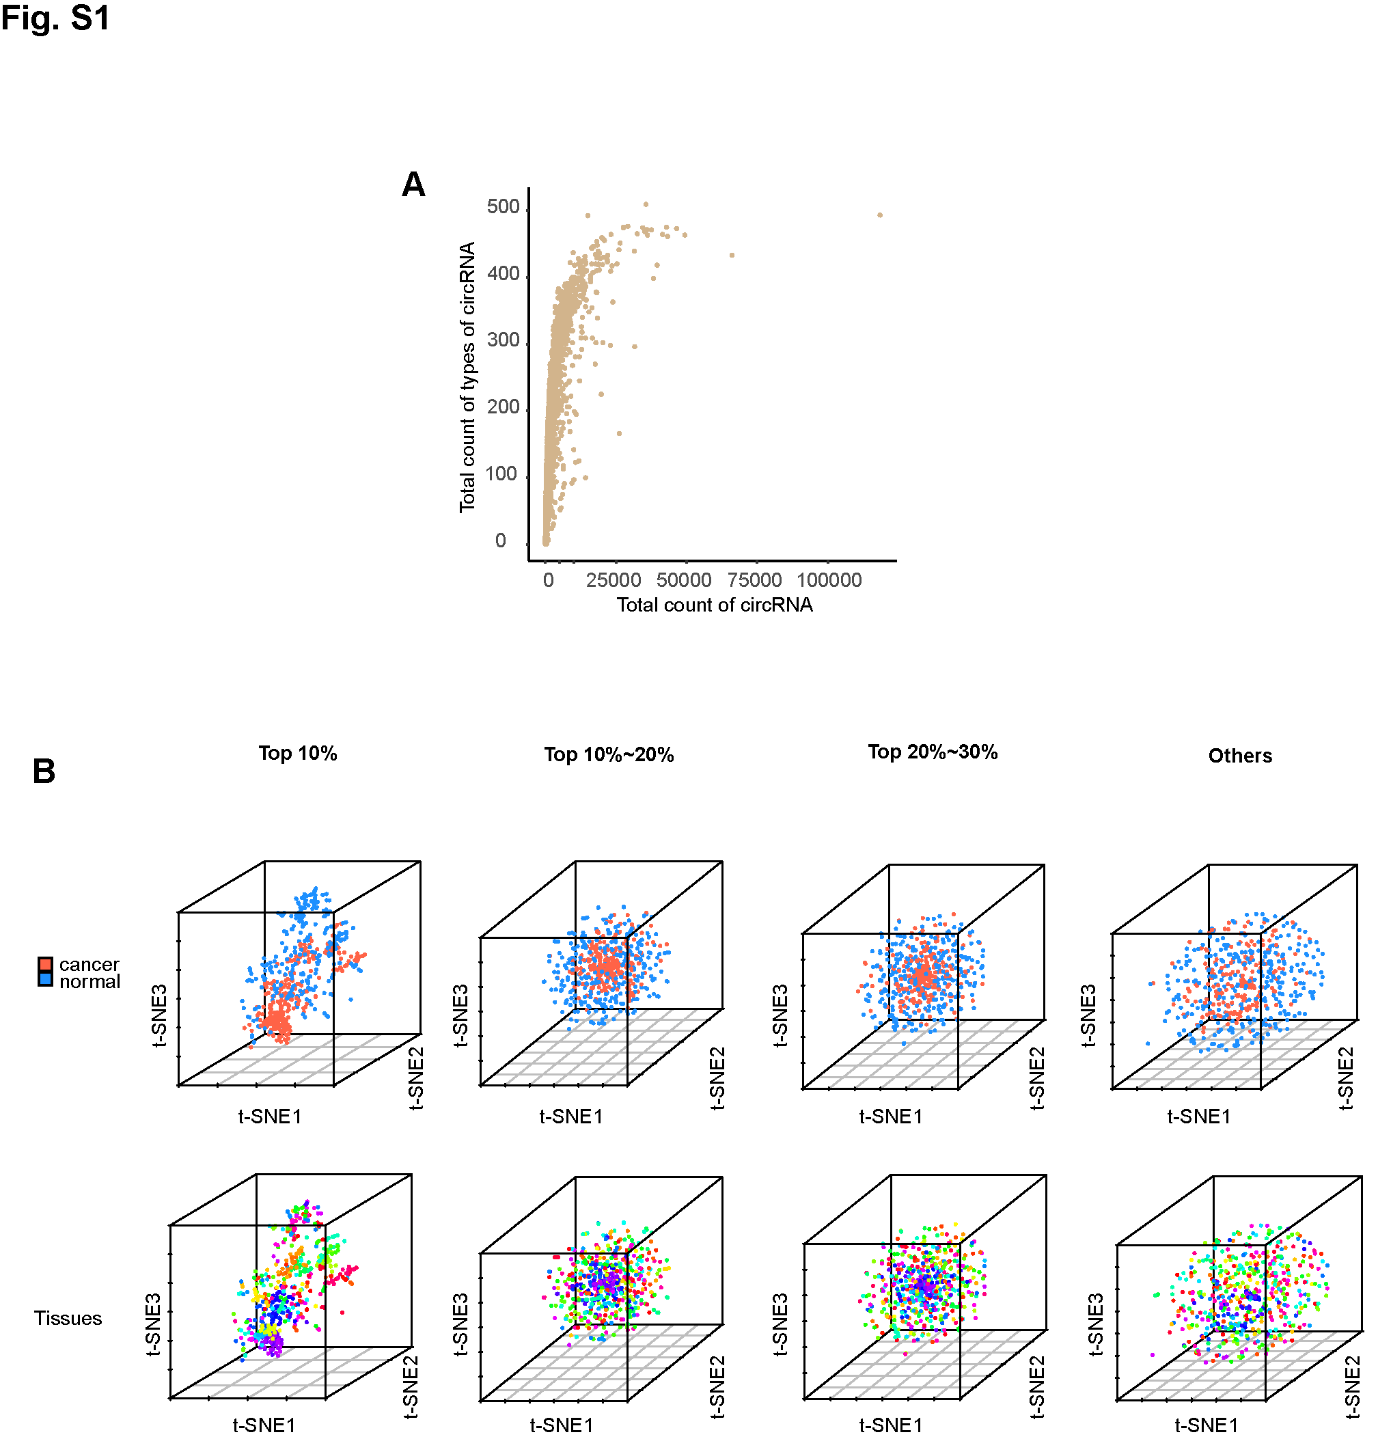
**Figure S1.** Supplementary figure for Figure 1. **a.** Relationship between total circRNA count and total count of circRNA types. Total count of circRNAs reflects sequencing depth. **b**. t-SNE embedding of circRNA profiles in 584 tissue samples, without PCA. The top 10%, top 10%‒20%, top 20%‒30% of the stably expressed circRNAs and others were analyzed separately. Red: cancer tissues; blue: normal tissues. Rainbow: tissue types.


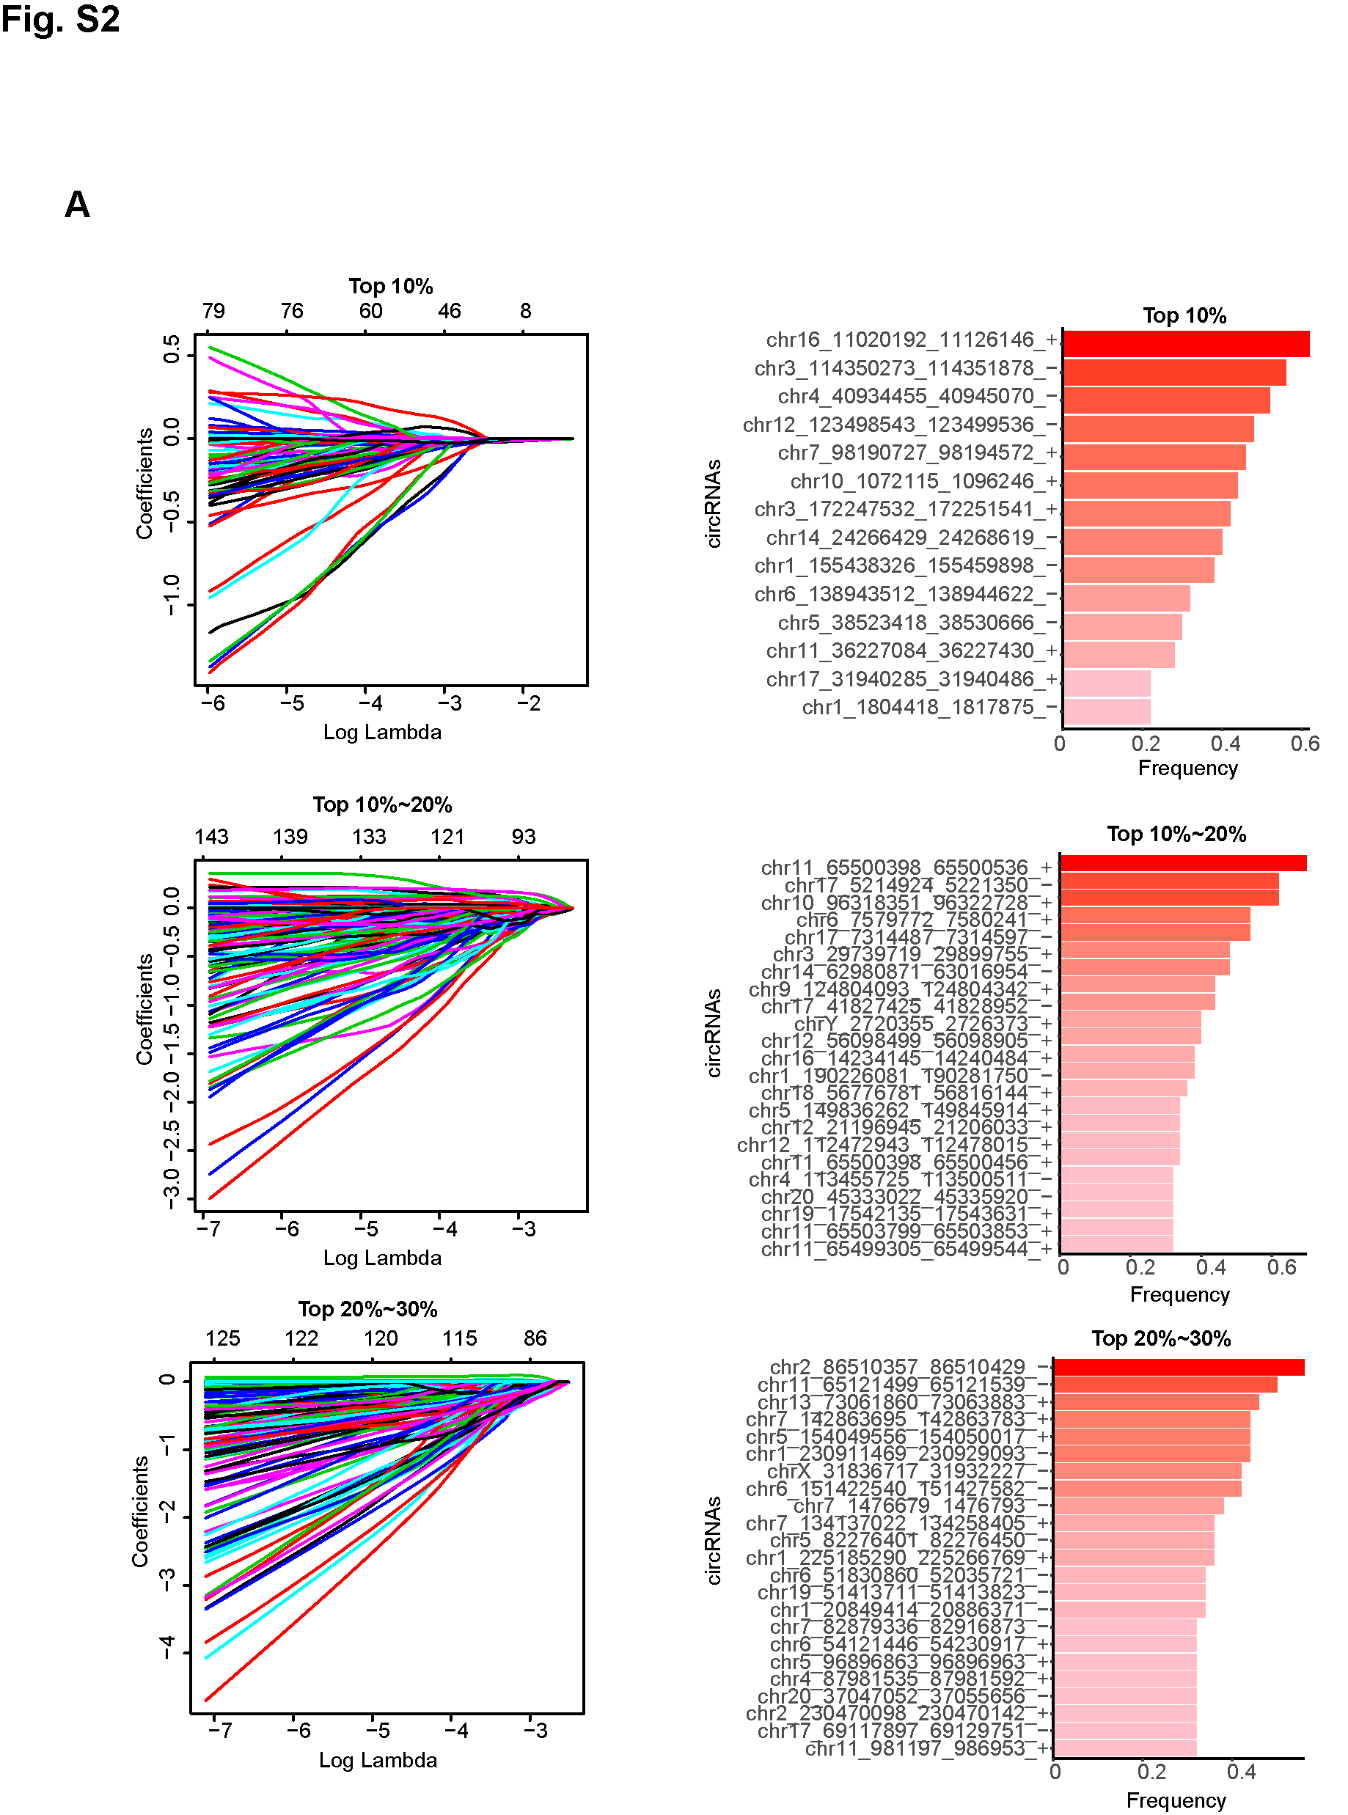
**Figure S2.** Supplementary figure for Figure 3. **a.** Correlation between coefficient and log lambda values in LASSO regression analysis with five-fold cross-validation. The top 10%, top 10%‒20%, and top 20%‒30% of the stably expressed circRNAs were analyzed separately. **b.** Frequency of the top selected circRNAs during the 50 repetitions of LASSO regression. The top 10%, top 10%‒20%, and top 20%‒30% of the stably expressed circRNAs were analyzed separately.


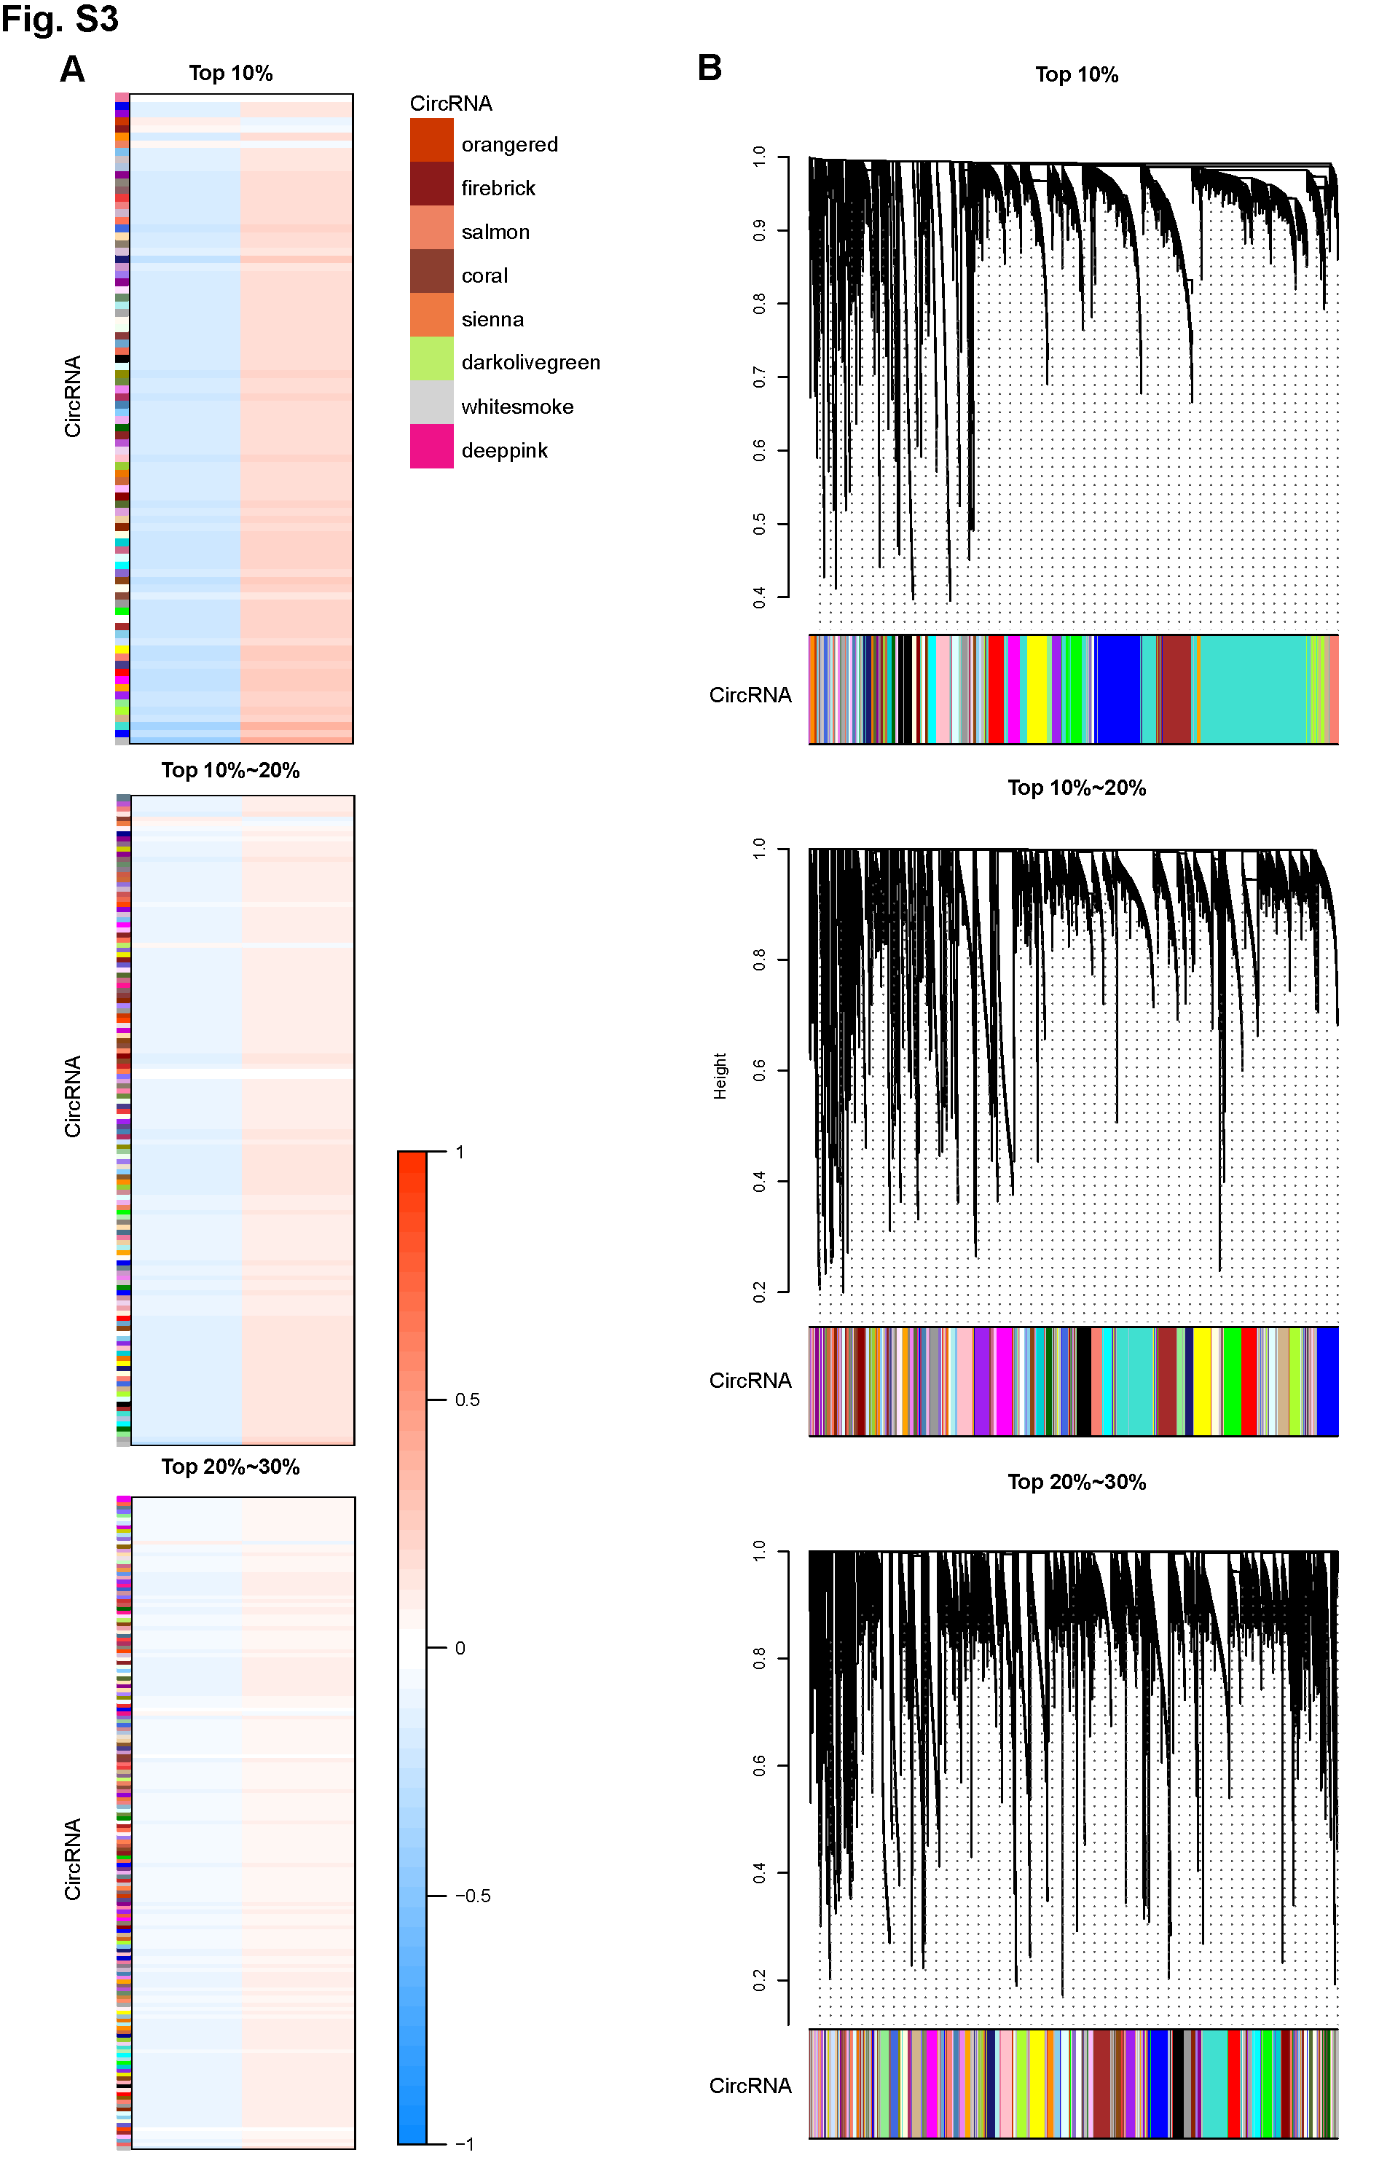


**Figure S3.** Supplementary figure for Figure 4, part A. **a**. Heatmap illustrating the correlation between the circRNA co-expression modules and sample type. The top 10% top 10%‒20%, and top 20%‒30% of the stably expressed circRNAs were analyzed separately. The rainbow-colored bars represent different co-expression modules. **b**. Cluster dendrograms demonstrating the clustering process during the division of circRNA co-expression modules. Rainbow-colored bars represent different co-expression modules.


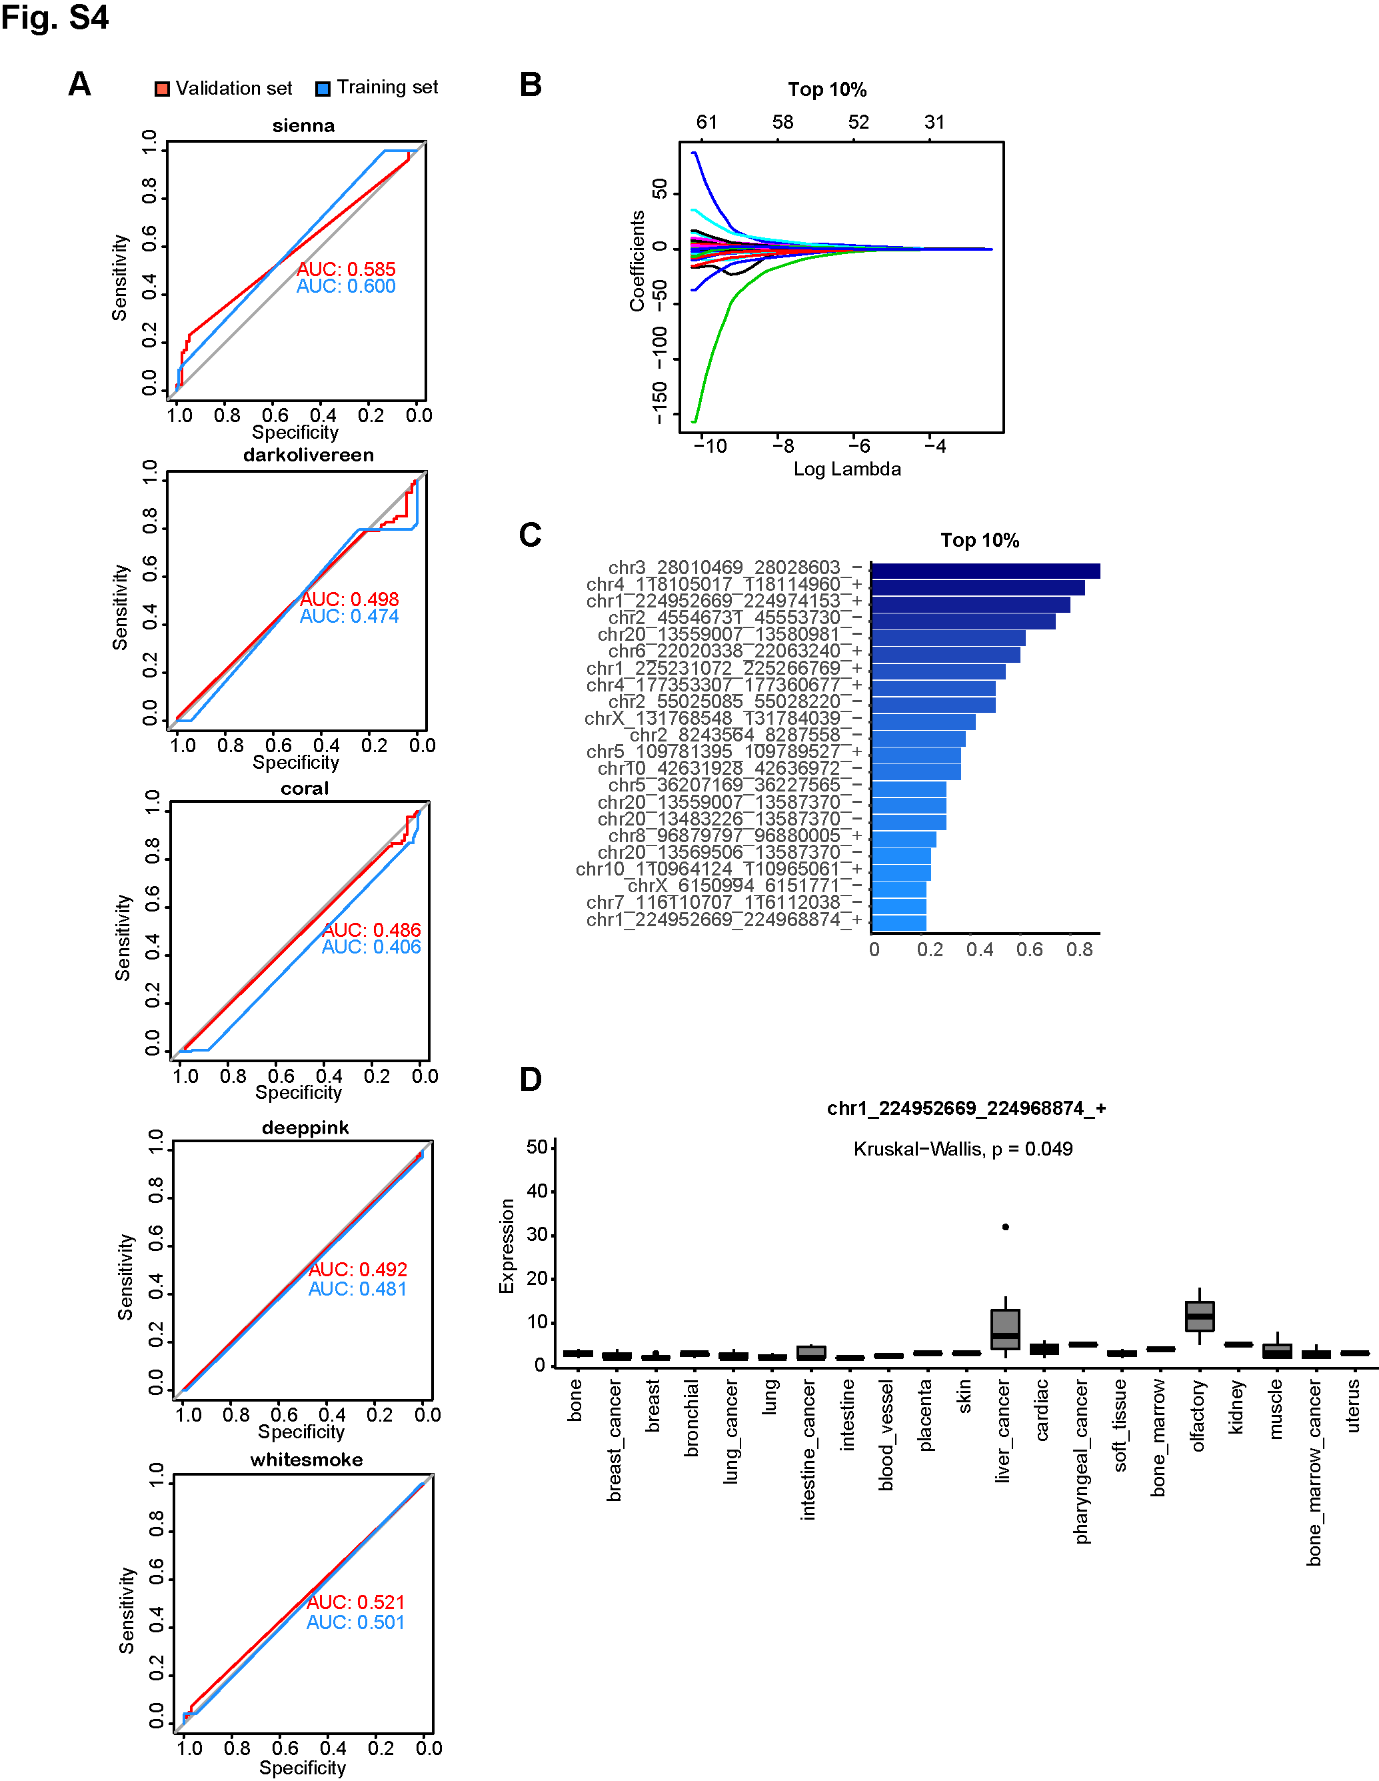
 **Figure S4.** Supplementary figure for Figure 1, part B. **a**. Receiver operating characteristic curve showing the ability of cancer tissue-enriched circRNAs to classify cancer and normal tissues via the support vector machine model. Different circRNA co-expression modules were computed separately. Blue: training set; red: validation set. **b.** Correlation between coefficient and log lambda values in the LASSO regression analysis with five-fold cross-validation. The cancer tissue-enriched circRNAs among the top 10% stably expressed circRNAs were further selected. **c.** Frequency of the top selected circRNAs during 50 repetitions of the LASSO regression. Cancer tissue-enriched circRNAs among the top 10% stably expressed circRNAs were further selected. **d.** Expression of chr1_224952669_224968874_+ in pan-cancer and normal tissues.

**Table S1** CircRNA profiles of pan-cancer tissues and normal tissues, provided by the CSCD (IDCSC) database.

Additional File 2 ‘Table S1’

**Table S2** Cancer-specific circRNAs associated with protein-coding genes

Additional File 2 ‘Table S2’
