# Supplementary material for: Comparative Analysis of Pan-cancer and Normal Tissues Reveals Cancer Tissue-enriched CircRNAs Associated with Cancer Mutations as Potential Exosomal Biomarkers
Source: Research Square preprint supplement (doi:10.21203/rs.3.rs-421398/v1), 2021-05-04
Supplement: Supplementary file 2 [file 94c5b1be8ced73aa9cd51c90.xlsx]

## Sheet: Table S1
Samples	Type	Site
acinic_cell_carcinoma_1	cancer	lung
acinic_cell_carcinoma_2	cancer	lung
acinic_cell_carcinoma_3	cancer	lung
adipose_adult_37_year_male	normal	soft_tissue
adipose_adult_51_year_female	normal	soft_tissue
adipose_adult_53_year_female	normal	soft_tissue
adipose_adult_54_year_male	normal	soft_tissue
adipose_omentum_adult_37_year_male	normal	soft_tissue
adipose_omentum_adult_51_year_female	normal	soft_tissue
adipose_omentum_adult_53_year_female	normal	soft_tissue
adipose_omentum_adult_54_year_male	normal	soft_tissue
adrenal_gland_1	normal	adrenal
adrenal_gland_2	normal	adrenal
adrenal_gland_3	normal	adrenal
airway_epithelial_cell_1	normal	olfactory
airway_epithelial_cell_2	normal	olfactory
aortic_smooth_muscle_cell_1	normal	aorta
aortic_smooth_muscle_cell_2	normal	aorta
articular_chondrocyte_of_knee_joint_1	normal	bone
articular_chondrocyte_of_knee_joint_2	normal	bone
ascending_aorta	normal	aorta
astrocyte_1	normal	brain
astrocyte_2	normal	brain
b_cell_1	normal	lymph
b_cell_2	normal	lymph
b_cell_3	normal	lymph
b_cell_4	normal	lymph
b_cell_5	normal	lymph
b_cell_6	normal	lymph
bladder_microvascular_endothelial_cell_1	normal	bladder
bladder_microvascular_endothelial_cell_2	normal	bladder
bladder_urothelial_carcinoma_1	cancer	bladder
bladder_urothelial_carcinoma_adj_normal_1	normal	bladder
bloodvessel_aorta_adult_54_year_male	normal	aorta
brain_1	normal	brain
brain_2	normal	brain
breast_cancer_1	cancer	breast
breast_cancer_10	cancer	breast
breast_cancer_11	cancer	breast
breast_cancer_12	cancer	breast
breast_cancer_13	cancer	breast
breast_cancer_14	cancer	breast
breast_cancer_15	cancer	breast
breast_cancer_2	cancer	breast
breast_cancer_3	cancer	breast
breast_cancer_4	cancer	breast
breast_cancer_5	cancer	breast
breast_cancer_6	cancer	breast
breast_cancer_7	cancer	breast
breast_cancer_8	cancer	breast
breast_cancer_9	cancer	breast
breast_cancer_adj_normal_1	normal	breast
breast_cancer_adj_normal_10	normal	breast
breast_cancer_adj_normal_11	normal	breast
breast_cancer_adj_normal_12	normal	breast
breast_cancer_adj_normal_13	normal	breast
breast_cancer_adj_normal_14	normal	breast
breast_cancer_adj_normal_15	normal	breast
breast_cancer_adj_normal_16	normal	breast
breast_cancer_adj_normal_17	normal	breast
breast_cancer_adj_normal_18	normal	breast
breast_cancer_adj_normal_2	normal	breast
breast_cancer_adj_normal_3	normal	breast
breast_cancer_adj_normal_4	normal	breast
breast_cancer_adj_normal_5	normal	breast
breast_cancer_adj_normal_6	normal	breast
breast_cancer_adj_normal_7	normal	breast
breast_cancer_adj_normal_8	normal	breast
breast_cancer_adj_normal_9	normal	breast
bronchial_epithelial_cell_1	normal	bronchial
bronchial_epithelial_cell_2	normal	bronchial
bronchial_smooth_muscle_cell_1	normal	bronchial
bronchial_smooth_muscle_cell_2	normal	bronchial
bronchus_fibroblast_of_lung_1	normal	bronchial
bronchus_fibroblast_of_lung_2	normal	bronchial
cardiac_atrium_fibroblast_1	normal	cardiac
cardiac_atrium_fibroblast_2	normal	cardiac
cardiac_ventricle_fibroblast_1	normal	cardiac
cardiac_ventricle_fibroblast_2	normal	cardiac
cd14_positive_monocyte_1	normal	PBMCs
cd14_positive_monocyte_2	normal	PBMCs
cd14_positive_monocyte_3	normal	PBMCs
cd14_positive_monocyte_4	normal	PBMCs
cd14_positive_monocyte_5	normal	PBMCs
cd14_positive_monocyte_6	normal	PBMCs
cervical_cancer_1	cancer	cervix
cervical_cancer_2	cancer	cervix
cervical_cancer_3	cancer	cervix
cervical_cancer_4	cancer	cervix
cervical_cancer_5	cancer	cervix
cervical_cancer_adj_normal_1	normal	cervix
cervical_cancer_adj_normal_2	normal	cervix
cervical_cancer_adj_normal_3	normal	cervix
cervical_cancer_adj_normal_4	normal	cervix
cervical_cancer_adj_normal_5	normal	cervix
clear_cell_carcinoma_1	cancer	lung
clear_cell_carcinoma_adj_normal_1	normal	lung
cn.aml_bone_marrow_1	cancer	bone_marrow
cn.aml_bone_marrow_10	cancer	bone_marrow
cn.aml_bone_marrow_11	cancer	bone_marrow
cn.aml_bone_marrow_12	cancer	bone_marrow
cn.aml_bone_marrow_13	cancer	bone_marrow
cn.aml_bone_marrow_14	cancer	bone_marrow
cn.aml_bone_marrow_15	cancer	bone_marrow
cn.aml_bone_marrow_16	cancer	bone_marrow
cn.aml_bone_marrow_17	cancer	bone_marrow
cn.aml_bone_marrow_18	cancer	bone_marrow
cn.aml_bone_marrow_19	cancer	bone_marrow
cn.aml_bone_marrow_2	cancer	bone_marrow
cn.aml_bone_marrow_20	cancer	bone_marrow
cn.aml_bone_marrow_3	cancer	bone_marrow
cn.aml_bone_marrow_4	cancer	bone_marrow
cn.aml_bone_marrow_5	cancer	bone_marrow
cn.aml_bone_marrow_6	cancer	bone_marrow
cn.aml_bone_marrow_7	cancer	bone_marrow
cn.aml_bone_marrow_8	cancer	bone_marrow
cn.aml_bone_marrow_9	cancer	bone_marrow
colon_1	normal	intestine
colon_2	normal	intestine
colon_carcinoma_1	cancer	intestine
colon_carcinoma_10	cancer	intestine
colon_carcinoma_11	cancer	intestine
colon_carcinoma_12	cancer	intestine
colon_carcinoma_13	cancer	intestine
colon_carcinoma_14	cancer	intestine
colon_carcinoma_15	cancer	intestine
colon_carcinoma_16	cancer	intestine
colon_carcinoma_2	cancer	intestine
colon_carcinoma_3	cancer	intestine
colon_carcinoma_4	cancer	intestine
colon_carcinoma_5	cancer	intestine
colon_carcinoma_6	cancer	intestine
colon_carcinoma_7	cancer	intestine
colon_carcinoma_8	cancer	intestine
colon_carcinoma_9	cancer	intestine
colon_carcinoma_adj_normal_1	normal	intestine
colon_carcinoma_adj_normal_2	normal	intestine
colon_carcinoma_adj_normal_3	normal	intestine
colon_carcinoma_adj_normal_4	normal	intestine
colon_carcinoma_adj_normal_5	normal	intestine
colon_carcinoma_adj_normal_6	normal	intestine
colon_carcinoma_adj_normal_7	normal	intestine
colon_carcinoma_adj_normal_8	normal	intestine
dermis_blood_vessel_endothelial_cell_1	normal	blood_vessel
dermis_blood_vessel_endothelial_cell_2	normal	blood_vessel
dermis_lymphatic_vessel_endothelial_cell_1	normal	lymph_vessel
dermis_lymphatic_vessel_endothelial_cell_2	normal	lymph_vessel
dermis_microvascular_lymphatic_vessel_endothelial_cell_1	normal	lymph_vessel
dermis_microvascular_lymphatic_vessel_endothelial_cell_2	normal	lymph_vessel
endometrial_microvascular_endothelial_cell_1	normal	uterus
endometrial_microvascular_endothelial_cell_2	normal	uterus
endothelial_cell_of_coronary_artery_1	normal	blood_vessel
endothelial_cell_of_coronary_artery_2	normal	blood_vessel
endothelial_cell_of_umbilical_vein_1	normal	blood_vessel
endothelial_cell_of_umbilical_vein_2	normal	blood_vessel
endothelial_cell_of_umbilical_vein_3	normal	blood_vessel
endothelial_cell_of_umbilical_vein_4	normal	blood_vessel
endothelial_cell_of_umbilical_vein_5	normal	blood_vessel
epithelial_cell_of_alveolus_of_lung_1	normal	lung
epithelial_cell_of_alveolus_of_lung_2	normal	lung
epithelial_cell_of_proximal_tubule_1	normal	kidney
epithelial_cell_of_proximal_tubule_2	normal	kidney
epithelial_cell_of_umbilical_artery_1	normal	blood_vessel
epithelial_cell_of_umbilical_artery_2	normal	blood_vessel
esophagogastric_junction_adult_37_year_male	normal	esophagus
esophagogastric_junction_adult_51_year_female	normal	esophagus
esophagogastric_junction_adult_53_year_female	normal	esophagus
esophagogastric_junction_adult_54_year_male	normal	esophagus
esophagus_mucosa_adult_37_year_male	normal	esophagus
esophagus_mucosa_adult_51_year_female	normal	esophagus
esophagus_mucosa_adult_53_year_female	normal	esophagus
esophagus_mucosa_adult_54_year_male	normal	esophagus
esophagus_muscle_layer_of_adult_37_year_male	normal	esophagus
esophagus_muscle_layer_of_adult_51_year_female	normal	esophagus
esophagus_muscle_layer_of_adult_53_year_female	normal	esophagus
esophagus_muscle_layer_of_adult_54_year_male	normal	esophagus
femalegonad_adult_51_year_female	normal	female_gonad
femalegonad_adult_53_year_female	normal	female_gonad
fibroblast_of_arm_1	normal	skin
fibroblast_of_arm_2	normal	skin
fibroblast_of_dermis_1	normal	skin
fibroblast_of_dermis_2	normal	skin
fibroblast_of_lung_1	normal	lung
fibroblast_of_lung_2	normal	lung
fibroblast_of_lung_3	normal	lung
fibroblast_of_lung_4	normal	lung
fibroblast_of_the_aortic_adventitia_1	normal	aorta
fibroblast_of_the_aortic_adventitia_2	normal	aorta
fibroblast_of_villous_mesenchyme_1	normal	placenta
fibroblast_of_villous_mesenchyme_2	normal	placenta
foreskin_keratinocyte_1	normal	skin
foreskin_keratinocyte_2	normal	skin
gastric_cancer_1	cancer	stomach
gastric_cancer_2	cancer	stomach
gastric_cancer_3	cancer	stomach
gastric_cancer_adj_normal_1	normal	stomach
gastric_cancer_adj_normal_2	normal	stomach
gastric_cancer_adj_normal_3	normal	stomach
gastrocnemius_medialis	normal	muscle
glioblastoma_1	cancer	brain
glioblastoma_2	cancer	brain
glioblastoma_3	cancer	brain
glioblastoma_adj_normal_1	normal	brain
glioblastoma_adj_normal_2	normal	brain
glioblastoma_adj_normal_3	normal	brain
glioblastoma_adj_normal_4	normal	brain
glioblastoma_adj_normal_5	normal	brain
glomerular_endothelial_cell_1	normal	kidney
glomerular_endothelial_cell_2	normal	kidney
hair_follicle_dermal_papilla_cell_1	normal	skin
hair_follicle_dermal_papilla_cell_2	normal	skin
hair_follicular_keratinocyte_1	normal	skin
hair_follicular_keratinocyte_2	normal	skin
hcc_1	cancer	liver
hcc_10	cancer	liver
hcc_11	cancer	liver
hcc_12	cancer	liver
hcc_13	cancer	liver
hcc_14	cancer	liver
hcc_15	cancer	liver
hcc_16	cancer	liver
hcc_17	cancer	liver
hcc_18	cancer	liver
hcc_19	cancer	liver
hcc_2	cancer	liver
hcc_20	cancer	liver
hcc_3	cancer	liver
hcc_4	cancer	liver
hcc_5	cancer	liver
hcc_6	cancer	liver
hcc_7	cancer	liver
hcc_8	cancer	liver
hcc_9	cancer	liver
hcc_adj_normal_1	normal	liver
hcc_adj_normal_10	normal	liver
hcc_adj_normal_11	normal	liver
hcc_adj_normal_12	normal	liver
hcc_adj_normal_13	normal	liver
hcc_adj_normal_14	normal	liver
hcc_adj_normal_15	normal	liver
hcc_adj_normal_16	normal	liver
hcc_adj_normal_17	normal	liver
hcc_adj_normal_18	normal	liver
hcc_adj_normal_19	normal	liver
hcc_adj_normal_2	normal	liver
hcc_adj_normal_20	normal	liver
hcc_adj_normal_3	normal	liver
hcc_adj_normal_4	normal	liver
hcc_adj_normal_5	normal	liver
hcc_adj_normal_6	normal	liver
hcc_adj_normal_7	normal	liver
hcc_adj_normal_8	normal	liver
hcc_adj_normal_9	normal	liver
heart_1	normal	cardiac
heart_2	normal	cardiac
heart_adult_34_year_male	normal	cardiac
heart_lv_adult_51_year_female	normal	cardiac
heart_lv_adult_53_year_female	normal	cardiac
heart_ra_adult_51_year_female	normal	cardiac
heart_ra_adult_53_year_female	normal	cardiac
hematopoietic_multipotent_progenitor_cell	normal	bone_marrow
hypopharyngeal_cancer_1	cancer	pharyngeal
hypopharyngeal_cancer_2	cancer	pharyngeal
hypopharyngeal_cancer_3	cancer	pharyngeal
hypopharyngeal_cancer_adj_normal_1	normal	pharyngeal
hypopharyngeal_cancer_adj_normal_2	normal	pharyngeal
hypopharyngeal_cancer_adj_normal_3	normal	pharyngeal
intestine_sigmoid_colon_adult_37_year_male	normal	colon
intestine_sigmoid_colon_adult_51_year_female	normal	colon
intestine_sigmoid_colon_adult_53_year_female	normal	colon
intestine_sigmoid_colon_adult_54_year_male	normal	colon
intestine_transverse_colon_adult_53_year_female	normal	colon
intestine_transverse_colon_adult_54_year_male	normal	colon
keratinocyte_1	normal	skin
keratinocyte_2	normal	skin
keratinocyte_3	normal	skin
keratinocyte_4	normal	skin
keratinocyte_5	normal	skin
keratinocyte_6	normal	skin
kidney_epithelial_cell_1	normal	kidney
kidney_epithelial_cell_2	normal	kidney
liver_1	normal	liver
liver_2	normal	liver
liver_adult_32_year_male	normal	liver
liver_adult_53_year_female_1	normal	liver
liver_adult_53_year_female_2	normal	liver
lower_leg_skin_1	normal	skin
lower_leg_skin_2	normal	skin
lower_leg_skin_3	normal	skin
lower_leg_skin_4	normal	skin
lower_leg_skin_5	normal	skin
lower_leg_skin_6	normal	skin
lower_leg_skin_7	normal	skin
lower_leg_skin_8	normal	skin
lung_1	normal	lung
lung_2	normal	lung
lung_adult_37_year_male	normal	lung
lung_adult_51_year_female	normal	lung
lung_adult_53_year_female	normal	lung
lung_adult_54_year_male	normal	lung
lung_microvascular_endothelial_cell_1	normal	lung
lung_microvascular_endothelial_cell_2	normal	lung
malignant_lymphoma_1	cancer	lymph
malignant_lymphoma_10	cancer	lymph
malignant_lymphoma_11	cancer	lymph
malignant_lymphoma_12	cancer	lymph
malignant_lymphoma_13	cancer	lymph
malignant_lymphoma_14	cancer	lymph
malignant_lymphoma_15	cancer	lymph
malignant_lymphoma_16	cancer	lymph
malignant_lymphoma_17	cancer	lymph
malignant_lymphoma_18	cancer	lymph
malignant_lymphoma_19	cancer	lymph
malignant_lymphoma_2	cancer	lymph
malignant_lymphoma_20	cancer	lymph
malignant_lymphoma_3	cancer	lymph
malignant_lymphoma_4	cancer	lymph
malignant_lymphoma_5	cancer	lymph
malignant_lymphoma_6	cancer	lymph
malignant_lymphoma_7	cancer	lymph
malignant_lymphoma_8	cancer	lymph
malignant_lymphoma_9	cancer	lymph
mammary_epithelial_cell_1	normal	breast
mammary_microvascular_endothelial_cell_1	normal	breast
mammary_microvascular_endothelial_cell_2	normal	breast
mammarygland_adult_37_year_male	normal	breast
mammarygland_adult_51_year_female	normal	breast
mammarygland_adult_53_year_female	normal	breast
melanocyte_of_skin_1	normal	skin
melanocyte_of_skin_2	normal	skin
melanocyte_of_skin_3	normal	skin
melanocyte_of_skin_4	normal	skin
mesangial_cell_1	normal	kidney
mesangial_cell_2	normal	kidney
mesenchymal_stem_cell_of_adipose_1	normal	soft_tissue
mesenchymal_stem_cell_of_adipose_2	normal	soft_tissue
mesenchymal_stem_cell_of_the_bone_marrow_1	normal	bone_marrow
mesenchymal_stem_cell_of_the_bone_marrow_2	normal	bone_marrow
mesenchymal_stem_cell_of_wharton_s_jelly_1	normal	soft_tissue
mesenchymal_stem_cell_of_wharton_s_jelly_2	normal	soft_tissue
mononuclear_cell	normal	PBMCs
myometrial_cell_1	normal	uterus
myometrial_cell_2	normal	uterus
nasal_cavity_respiratory_epithelium_epithelial_cell_of_viscerocranial_mucosa_1	normal	olfactory
nasal_cavity_respiratory_epithelium_epithelial_cell_of_viscerocranial_mucosa_2	normal	olfactory
non.muscle_invasive_bladder_cancer_1	cancer	bladder
non.muscle_invasive_bladder_cancer_10	cancer	bladder
non.muscle_invasive_bladder_cancer_11	cancer	bladder
non.muscle_invasive_bladder_cancer_12	cancer	bladder
non.muscle_invasive_bladder_cancer_13	cancer	bladder
non.muscle_invasive_bladder_cancer_14	cancer	bladder
non.muscle_invasive_bladder_cancer_15	cancer	bladder
non.muscle_invasive_bladder_cancer_16	cancer	bladder
non.muscle_invasive_bladder_cancer_17	cancer	bladder
non.muscle_invasive_bladder_cancer_18	cancer	bladder
non.muscle_invasive_bladder_cancer_19	cancer	bladder
non.muscle_invasive_bladder_cancer_2	cancer	bladder
non.muscle_invasive_bladder_cancer_20	cancer	bladder
non.muscle_invasive_bladder_cancer_3	cancer	bladder
non.muscle_invasive_bladder_cancer_4	cancer	bladder
non.muscle_invasive_bladder_cancer_5	cancer	bladder
non.muscle_invasive_bladder_cancer_6	cancer	bladder
non.muscle_invasive_bladder_cancer_7	cancer	bladder
non.muscle_invasive_bladder_cancer_8	cancer	bladder
non.muscle_invasive_bladder_cancer_9	cancer	bladder
non.small_cell_lung_cancer.adenocarcinoma_1	cancer	lung
non.small_cell_lung_cancer.adenocarcinoma_10	cancer	lung
non.small_cell_lung_cancer.adenocarcinoma_11	cancer	lung
non.small_cell_lung_cancer.adenocarcinoma_12	cancer	lung
non.small_cell_lung_cancer.adenocarcinoma_13	cancer	lung
non.small_cell_lung_cancer.adenocarcinoma_14	cancer	lung
non.small_cell_lung_cancer.adenocarcinoma_15	cancer	lung
non.small_cell_lung_cancer.adenocarcinoma_16	cancer	lung
non.small_cell_lung_cancer.adenocarcinoma_17	cancer	lung
non.small_cell_lung_cancer.adenocarcinoma_18	cancer	lung
non.small_cell_lung_cancer.adenocarcinoma_19	cancer	lung
non.small_cell_lung_cancer.adenocarcinoma_2	cancer	lung
non.small_cell_lung_cancer.adenocarcinoma_20	cancer	lung
non.small_cell_lung_cancer.adenocarcinoma_3	cancer	lung
non.small_cell_lung_cancer.adenocarcinoma_4	cancer	lung
non.small_cell_lung_cancer.adenocarcinoma_5	cancer	lung
non.small_cell_lung_cancer.adenocarcinoma_6	cancer	lung
non.small_cell_lung_cancer.adenocarcinoma_7	cancer	lung
non.small_cell_lung_cancer.adenocarcinoma_8	cancer	lung
non.small_cell_lung_cancer.adenocarcinoma_9	cancer	lung
non.small_cell_lung_cancer.squamous_cell_carcinoma_1	cancer	lung
non.small_cell_lung_cancer.squamous_cell_carcinoma_10	cancer	lung
non.small_cell_lung_cancer.squamous_cell_carcinoma_11	cancer	lung
non.small_cell_lung_cancer.squamous_cell_carcinoma_12	cancer	lung
non.small_cell_lung_cancer.squamous_cell_carcinoma_13	cancer	lung
non.small_cell_lung_cancer.squamous_cell_carcinoma_14	cancer	lung
non.small_cell_lung_cancer.squamous_cell_carcinoma_15	cancer	lung
non.small_cell_lung_cancer.squamous_cell_carcinoma_16	cancer	lung
non.small_cell_lung_cancer.squamous_cell_carcinoma_17	cancer	lung
non.small_cell_lung_cancer.squamous_cell_carcinoma_18	cancer	lung
non.small_cell_lung_cancer.squamous_cell_carcinoma_19	cancer	lung
non.small_cell_lung_cancer.squamous_cell_carcinoma_2	cancer	lung
non.small_cell_lung_cancer.squamous_cell_carcinoma_20	cancer	lung
non.small_cell_lung_cancer.squamous_cell_carcinoma_21	cancer	lung
non.small_cell_lung_cancer.squamous_cell_carcinoma_22	cancer	lung
non.small_cell_lung_cancer.squamous_cell_carcinoma_23	cancer	lung
non.small_cell_lung_cancer.squamous_cell_carcinoma_24	cancer	lung
non.small_cell_lung_cancer.squamous_cell_carcinoma_25	cancer	lung
non.small_cell_lung_cancer.squamous_cell_carcinoma_26	cancer	lung
non.small_cell_lung_cancer.squamous_cell_carcinoma_27	cancer	lung
non.small_cell_lung_cancer.squamous_cell_carcinoma_28	cancer	lung
non.small_cell_lung_cancer.squamous_cell_carcinoma_29	cancer	lung
non.small_cell_lung_cancer.squamous_cell_carcinoma_3	cancer	lung
non.small_cell_lung_cancer.squamous_cell_carcinoma_30	cancer	lung
non.small_cell_lung_cancer.squamous_cell_carcinoma_4	cancer	lung
non.small_cell_lung_cancer.squamous_cell_carcinoma_5	cancer	lung
non.small_cell_lung_cancer.squamous_cell_carcinoma_6	cancer	lung
non.small_cell_lung_cancer.squamous_cell_carcinoma_7	cancer	lung
non.small_cell_lung_cancer.squamous_cell_carcinoma_8	cancer	lung
non.small_cell_lung_cancer.squamous_cell_carcinoma_9	cancer	lung
osteoblast_1	normal	bone
osteoblast_2	normal	bone
pancreas_adult_51_year_female	normal	pancreas
pancreas_adult_53_year_female	normal	pancreas
pancreatic_cancer_1	cancer	pancreas
pancreatic_cancer_10	cancer	pancreas
pancreatic_cancer_11	cancer	pancreas
pancreatic_cancer_12	cancer	pancreas
pancreatic_cancer_13	cancer	pancreas
pancreatic_cancer_14	cancer	pancreas
pancreatic_cancer_15	cancer	pancreas
pancreatic_cancer_16	cancer	pancreas
pancreatic_cancer_17	cancer	pancreas
pancreatic_cancer_18	cancer	pancreas
pancreatic_cancer_19	cancer	pancreas
pancreatic_cancer_2	cancer	pancreas
pancreatic_cancer_20	cancer	pancreas
pancreatic_cancer_21	cancer	pancreas
pancreatic_cancer_22	cancer	pancreas
pancreatic_cancer_23	cancer	pancreas
pancreatic_cancer_24	cancer	pancreas
pancreatic_cancer_25	cancer	pancreas
pancreatic_cancer_26	cancer	pancreas
pancreatic_cancer_27	cancer	pancreas
pancreatic_cancer_28	cancer	pancreas
pancreatic_cancer_29	cancer	pancreas
pancreatic_cancer_3	cancer	pancreas
pancreatic_cancer_30	cancer	pancreas
pancreatic_cancer_31	cancer	pancreas
pancreatic_cancer_32	cancer	pancreas
pancreatic_cancer_33	cancer	pancreas
pancreatic_cancer_34	cancer	pancreas
pancreatic_cancer_35	cancer	pancreas
pancreatic_cancer_36	cancer	pancreas
pancreatic_cancer_37	cancer	pancreas
pancreatic_cancer_38	cancer	pancreas
pancreatic_cancer_39	cancer	pancreas
pancreatic_cancer_4	cancer	pancreas
pancreatic_cancer_40	cancer	pancreas
pancreatic_cancer_41	cancer	pancreas
pancreatic_cancer_42	cancer	pancreas
pancreatic_cancer_43	cancer	pancreas
pancreatic_cancer_44	cancer	pancreas
pancreatic_cancer_46	cancer	pancreas
pancreatic_cancer_47	cancer	pancreas
pancreatic_cancer_48	cancer	pancreas
pancreatic_cancer_49	cancer	pancreas
pancreatic_cancer_5	cancer	pancreas
pancreatic_cancer_50	cancer	pancreas
pancreatic_cancer_51	cancer	pancreas
pancreatic_cancer_6	cancer	pancreas
pancreatic_cancer_7	cancer	pancreas
pancreatic_cancer_9	cancer	pancreas
pericardium_fibroblast_1	normal	cardiac
pericardium_fibroblast_2	normal	cardiac
pericyte_1	normal	pericyte
pericyte_2	normal	pericyte
placental_epithelial_cell_1	normal	placenta
placental_epithelial_cell_2	normal	placenta
placental_pericyte_1	normal	pericyte
placental_pericyte_2	normal	pericyte
prostate_cancer_1	cancer	prostate
prostate_cancer_adj_normal_1	normal	prostate
pulmonary_artery_endothelial_cell_1	normal	blood_vessel
pulmonary_artery_endothelial_cell_2	normal	blood_vessel
regular_cardiac_myocyte_1	normal	cardiac
regular_cardiac_myocyte_2	normal	cardiac
renal_cell_carcinoma_1	cancer	kidney
renal_cell_carcinoma_2	cancer	kidney
renal_cell_carcinoma_3	cancer	kidney
renal_cell_carcinoma_4	cancer	kidney
renal_cell_carcinoma_5	cancer	kidney
renal_cell_carcinoma_6	cancer	kidney
renal_cell_carcinoma_7	cancer	kidney
renal_cell_carcinoma_adj_normal_1	normal	kidney
renal_cell_carcinoma_adj_normal_2	normal	kidney
renal_cell_carcinoma_adj_normal_3	normal	kidney
renal_cell_carcinoma_adj_normal_4	normal	kidney
renal_cell_carcinoma_adj_normal_5	normal	kidney
renal_cell_carcinoma_adj_normal_6	normal	kidney
renal_cell_carcinoma_adj_normal_7	normal	kidney
renal_cortical_epithelial_cell_1	normal	kidney
renal_cortical_epithelial_cell_2	normal	kidney
skeletal_muscle_myoblast_1	normal	muscle
skeletal_muscle_myoblast_2	normal	muscle
skeletal_muscle_satellite_cell_1	normal	muscle
skeletal_muscle_satellite_cell_2	normal	muscle
skeletalmuscle_adult_51_year_female	normal	muscle
skeletalmuscle_adult_53_year_female	normal	muscle
skeletalmuscle_adult_54_year_male	normal	muscle
skin_adult_37_year_male	normal	skin
skin_adult_54_year_male	normal	skin
smooth_muscle_cell_of_bladder_1	normal	muscle
smooth_muscle_cell_of_bladder_2	normal	muscle
smooth_muscle_cell_of_the_coronary_artery_1	normal	muscle
smooth_muscle_cell_of_the_coronary_artery_2	normal	muscle
smooth_muscle_cell_of_the_pulmonary_artery_1	normal	muscle
smooth_muscle_cell_of_the_pulmonary_artery_2	normal	muscle
smooth_muscle_cell_of_the_umbilical_artery_1	normal	muscle
smooth_muscle_cell_of_the_umbilical_artery_2	normal	muscle
smooth_muscle_cell_of_trachea_1	normal	muscle
smooth_muscle_cell_of_trachea_2	normal	muscle
spleen_1	normal	spleen
spleen_2	normal	spleen
spleen_3	normal	spleen
spleen_4	normal	spleen
stomach_1	normal	stomach
stomach_2	normal	stomach
stomach_3	normal	stomach
stomach_4	normal	stomach
stomach_5	normal	stomach
stomach_6	normal	stomach
subcutaneous_preadipocyte_1	normal	soft_tissue
subcutaneous_preadipocyte_2	normal	soft_tissue
suprapubic_skin_1	normal	skin
suprapubic_skin_2	normal	skin
t.all_bone_marrow_1	cancer	bone_marrow
t.all_bone_marrow_10	cancer	bone_marrow
t.all_bone_marrow_11	cancer	bone_marrow
t.all_bone_marrow_12	cancer	bone_marrow
t.all_bone_marrow_13	cancer	bone_marrow
t.all_bone_marrow_14	cancer	bone_marrow
t.all_bone_marrow_15	cancer	bone_marrow
t.all_bone_marrow_16	cancer	bone_marrow
t.all_bone_marrow_17	cancer	bone_marrow
t.all_bone_marrow_18	cancer	bone_marrow
t.all_bone_marrow_19	cancer	bone_marrow
t.all_bone_marrow_2	cancer	bone_marrow
t.all_bone_marrow_20	cancer	bone_marrow
t.all_bone_marrow_21	cancer	bone_marrow
t.all_bone_marrow_22	cancer	bone_marrow
t.all_bone_marrow_23	cancer	bone_marrow
t.all_bone_marrow_24	cancer	bone_marrow
t.all_bone_marrow_25	cancer	bone_marrow
t.all_bone_marrow_3	cancer	bone_marrow
t.all_bone_marrow_4	cancer	bone_marrow
t.all_bone_marrow_5	cancer	bone_marrow
t.all_bone_marrow_6	cancer	bone_marrow
t.all_bone_marrow_7	cancer	bone_marrow
t.all_bone_marrow_8	cancer	bone_marrow
t.all_bone_marrow_9	cancer	bone_marrow
testis_1	normal	testis
testis_2	normal	testis
thoracic_aorta_endothelial_cell_1	normal	aorta
thoracic_aorta_endothelial_cell_2	normal	aorta
thyroidgland_1	normal	thyroid
thyroidgland_2	normal	thyroid
thyroidgland_3	normal	thyroid
thyroidgland_adult_54_year_male	normal	thyroid
tibialnerve_adult_37_year_male	normal	nerve
tibialnerve_adult_51_year_female	normal	nerve
tibialnerve_adult_53_year_female	normal	nerve
tibialnerve_adult_54_year_male	normal	nerve
tongue_squamous_cell_carcinoma_1	cancer	tongue
tongue_squamous_cell_carcinoma_2	cancer	tongue
tongue_squamous_cell_carcinoma_3	cancer	tongue
tongue_squamous_cell_carcinoma_adj_normal_1	normal	tongue
tongue_squamous_cell_carcinoma_adj_normal_2	normal	tongue
tongue_squamous_cell_carcinoma_adj_normal_3	normal	tongue
tracheal_epithelial_cell_1	normal	olfactory
tracheal_epithelial_cell_2	normal	olfactory
transverse_colon	normal	intestine
uterine_smooth_muscle_cell_1	normal	uterus
uterine_smooth_muscle_cell_2	normal	uterus
uterus_1	normal	uterus
uterus_2	normal	uterus
vagina	normal	vagina
vein_endothelial_cell_1	normal	blood_vessel
vein_endothelial_cell_2	normal	blood_vessel

## Sheet: Table S2
circRNA	Counts of cancer samples harboring the circRNA	Host gene name (Protein-coding)
chr17_78004169_78005079_+	23	TNRC6C
chr10_96318351_96322728_+	17	DNTT
chr17_7314487_7314597_-	17	GPS2
chr17_7314487_7314597_-	17	AC026954.2
chr17_64503381_64503429_-	9	DDX5
chr2_87772168_87794193_-	9	RGPD2
chrX_133692368_133754176_-	8	GPC3
chrX_133953049_133953211_-	8	GPC3
chr10_68747160_68773099_+	7	CCAR1
chr10_97030756_97034542_-	7	SLIT1
chr1_225185290_225266769_+	6	DNAH14
chr11_65121499_65121539_-	6	FAU
chr15_45363899_45376819_-	6	GATM
chr2_230470098_230470142_+	6	SP100
chr2_86510357_86510429_-	6	RNF103-CHMP3
chr2_86510357_86510429_-	6	CHMP3
chr20_13483226_13483337_-	6	TASP1
chr4_153350063_153358622_+	6	MND1
chr5_180040452_180040647_-	6	RNF130
chr5_82276401_82276450_-	6	RPS23
chr1_230911469_230929093_-	5	TTC13
chr10_18666574_18668677_+	5	ARL5B
chr10_26511746_26541692_+	5	APBB1IP
chr12_57751206_57751296_-	5	CDK4
chr15_45364796_45376819_-	5	GATM
chr19_41720921_41727352_+	5	AC243967.1
chr19_41720921_41727352_+	5	CEACAM5
chr3_151156160_151165982_+	5	MED12L
chr3_179874326_179898246_-	5	PEX5L
chr4_87981535_87981592_+	5	SPP1
chr5_180564488_180569340_+	5	CNOT6
chr7_142863695_142863783_+	5	EPHB6
chr8_38114191_38115000_+	5	ASH2L
chr9_77922160_77922345_-	5	GNAQ
chr10_112155863_112182891_-	4	GPAM
chr10_6430809_6442081_-	4	PRKCQ
chr10_96318351_96335974_+	4	DNTT
chr11_118349742_118350683_+	4	CD3G
chr11_74368491_74371817_-	4	PGM2L1
chr17_18731069_18732134_+	4	TRIM16L
chr17_31181421_31214585_+	4	NF1
chr17_3727918_3734949_-	4	ITGAE
chr17_75563178_75563302_+	4	LLGL2
chr19_17837931_17838390_-	4	JAK3
chr2_87772168_87792341_-	4	RGPD2
chr20_13417447_13483337_-	4	TASP1
chr20_13483226_13623514_-	4	TASP1
chr21_39206107_39215362_-	4	BRWD1
chr22_17655661_17655832_+	4	BCL2L13
chr3_111598119_111606792_+	4	CD96
chr3_196053417_196069568_-	4	TFRC
chr3_35681713_35691005_+	4	ARPP21
chr4_118105017_118138239_+	4	NDST3
chr4_1803836_1803910_+	4	FGFR3
chr5_1432463_1443242_-	4	SLC6A3
chr5_170270718_170270917_-	4	LCP2
chr5_32363947_32364275_-	4	ZFR
chr5_76300728_76301545_+	4	SV2C
chr5_81615472_81636618_-	4	SSBP2
chr5_96896863_96896963_+	4	ERAP2
chr6_54870186_54870690_+	4	FAM83B
chr8_94887926_94890550_-	4	CCNE2
